# Supplementary material
Source: publisher site journal article supplement (https://www.spandidos-publications.com/2089/downloadSupplementary)
Supplement: Supplementary file 1 [file downloadSupplementary]

## Sheet: Sheet1
Table SI. Characteristics of the 75-year-old patient with COVID-19.
Date		Jan.31	Feb.01	Feb.02	Feb.05	Feb.13	Feb.17	Feb.23	Feb.28	Mar.02	Mar.05	Mar.06	Mar.07	Mar.10	Mar.19	Mar.21	Mar.23	Apr.08	Apr.16
Blood routine	WBC	3.76	16.6	17.3	17.1	14.5	8.49	8.03	7.1	8.55	7.14	7.86	9.6	14.4	12.4	13.2	11.2	10.81	10.76
	LYMPH%	0.11	0.03	0.02	0.03	0.02	0.05	0.07	0.08	0.02	0.06	0.03	0.06	0.06	0.09	0.09	0.1	0.05	0.1
	LYMPH	0.41	0.5	0.35	0.51	0.29	0.42	0.56	0.57	0.26	0.43	0.17	0.58	0.86	0.99	0.79	0.36	0.57	1.08
	Hb	104	119	100	107	95	88	83	113	89	90	86	111	94	112	111	84	81	82
	PLT	80	126	108	70	88	97	72	156	117	120	101	110	100	70	72	73	95	105
Electrolyte	K+	5.23	5.01	5.48	4.48	4.3	3.88	4.29	5.22	5.32	4.29	5.21	4.37	3.87	4.15	3.87	4.16	3.79	3.83
Renal function	SCR	103	101	66	97	165	136	85	119	249	213	266	321	254	114	108	95	85	106
	BUN	13.1	12	8.19	11.5	22	15.8	7.77	10.6	20	14.5	20.7	12.3	25.8	33.2	34.1	27.8	34.7	36.59
Coagulation function	D2-dimer	1.15	2.21		5.78		2.19		5.59	3.26	2.25		2.24	1.33	0.87	0.55	0.88	1.45	0.74
Cardiac enzyme	LDH			517	455			273	286	355	276	399	224	255	321	320	267	402	398
	CK			66	816			73	72	41	31	34	35	27	33	37	78	207	43
CRP		71	27.3	10.7	1.3	20.2	13	26.7	107	95.7	54.9		28.5	33.4	30.8	25.7	94.1	76	26.5
Myocardial infarction	MYO	141.2		100.9				868.8	918.3	586.7	521	377	213.5	170.1	121.8	123.9	719	1063	889
	TNT	16.1	18.4	21.2	257.4	407	155.5	59.1	134	177	153	111	127	150	50.8	55.5	50.5	61.81	94.1
PCT		0.34		0.17				4.18							1.21				1.1
BNP		1131	1566	1205	1146	990	850	611.1	470	1575	2913	4166	2584	2012	2916	3101	2805	3301	3509
BG		26.87									10							108.6	10
Blood gas assay	FiO2		60	60		60	45	50	50	50	40	40	40	40	40	33	40	40	40
	SpO2	65.5	68.3	57.4	81.5	88.7	81.9	96.8	86.8	89.3	98	91.1	130	135	147	118	142	114	142
	PCO2		29.8	27.5		46.5	32.1	36.8	37.8	38.4	38.5	35.7	33.8	34.1	28.1	25.1	31.7	31.2	27.5
	LAC		2.4	3.4		1	0.8	1.9	1.3	1.1	1	0.8	1.2	0.6	0.9	1.3	1.7	1.5	2
	OI	109	114	95.7	163	149	182	194	174	179	245	228	325	365	395	357.8	473.3	454	487
	P(A-a)O2					10	177	186.9	193.7	178.9	117.6	2.9	109.2	130	68.9	70	105.1	137.6	74.5
Intake and Output	fluid	1932	3444	2623	2577	1584	1483	3552.5	2026	1110	1292	600	1160	1530	1580	1230	3146	3092	1400
	UO	2250	3840	3907	3262	2300	1870	4998	1195	855	930	3119	2745	3285	2530	2240	3200	4406	735
Other measures	TPE		TPE
		Oxiris		Oxiris				M100		Oxiris			Oxiris	Oxiris				Oxiris
	CVVH/CVVHDF																	CVVHDF
Vital Signs	T	37.4	37.8	36.2	36.9	36.3	36.8	36.8	36.7	36.8	36.1	36.7	36.4	36.7	36.3	36.3	36.5	36.9	36.8
	R	18	17	19	16	15	17	16	24	12	15	15	25	16	18	19	20	18	18
	BP	140/62	145/60	147/58	141/65	116/65	140/65	154/69	135/71	133/69	131/71	141/68	123/68	142/69	146/72	128/71	135/74	165/82	140/70
	HR	68	66	65	68	75	60	67	95	74	71	69	61	72	72	82	78	100	90
SARS-CoV-2	Nucleic acid testing					Alveolar Wash(+)		Alveolar Wash(+)			Alveolar Wash(-)			Alveolar Wash(-)	Off Ventilator (day2)	humidified fluid in oxygen (-)			humidified fluid in oxygen (-)
Cytokines	IL-2	2.76	1.77	1.77	1.26	2.16	1.08	1.56	1.25	1.3	1.35	1.44	1.28	1.42	1.23	0.62	1.78	0.67	1.25
	IL-4	4.25	3.04	3.04	1.15	2.74	1.34	2.41	0.88	0.68	1.4	1.2	0.76	1.22	0.78	1.11	0.91	0.5	0.57
	IL-6	5.85	11.09	10.25	8.38	209.58	158.89	79.56	140.73	77.75	33.7	44.9	42.8	39.95	35.5	27.28	16.44	8.69	8.53
	IL-10	3.78	10.39	13.87	15.86	27.31	22.85	19.54	21.96	5.77	2.78	9.87	5.74	5.87	8.57	4.55	3.99	2.64	3.78
	TNF-α	1.91	2.02	2.02	1.09	5.59	2.99	3.94	0.56	0.56	2.47	0.2	0.72	0.66	0.68	1.26	1.01	0.2	0.15
	TNF-γ	1.82	1.87	1.87	1.35	4.05	1.99	1.65	1.03	0.67	0.88	1.03	1	0.98	0.37	0.68	0.82	0.34	0.46
